# Supplementary material for: NT-proBNP serves as a prognostic marker for adverse outcomes in severe immune checkpoint inhibitor-associated myocarditis
Source: PeerJ. 2025 Oct 6;13:e20020. doi: 10.7717/peerj.20020 (PMC12510244; doi:10.7717/peerj.20020)
Supplement: Supplemental Information 2 [file peerj-13-20020-s002.xlsx]

## Sheet: BNP
patient_ID	cancer type	Symptoms of myocarditis	Age	sex	Smoking status	Comorbidities	Multi-organ irAEs	Line of Therapy	Immunotherapy Drugs	Grade of myocarditis	NT_proBNP	CTnT	CPK	CKMB		treatment modality	outcome	note
1	Esophageal cancer	Dyspnea	70	female	no smoker	Hypertension, diabetes mellitus		First line	Envafolimab	grade 3	2430	0.781	1023	32		high-dose MP	recovered
2	Esophageal cancer	Palpitations	64	female	no smoker			Second line	Pembrolizumab	grade 3	1435	0.565	152	42		high-dose MP+MMF	recovered
3	Gastric cancer	Dyspnea	71	male	no smoker	Hypertension		First line	Camrelizumab	garde 3	2400	0.509	2231	56		high-dose MP	recovered
4	lung cancer	Muscle weakness	73	male	smoker	diabetes mellitus		First line	Sintilimab	garde 3	2140	0.658	3800	83		high-dose MP	recovered
5	Gastric cancer	Lightheadedness	62	male	no smoker			First line	Tislelizumab	garde 3	2510	0.615	1250	52		high-dose MP	recovered
6	lung cancer	Chest pain	48	male	smoker	Hypertension	Hepatitis	Third line and beyond	Pembrolizumab	garde 3	4050	0.564	1050	29		high-dose MP	recovered
7	lung cancer	Palpitations	52	male	smoker		Thyroiditis, Pneumonitis	Second line	Sintilimab	garde 4	25400	1.521	5210	164		High-dose MP+IVIG+Plasmapheresis+MMF	recovered
8	lung cancer	Palpitations	78	male	smoker	diabetes mellitus	Dermatitis	Second line	Tislelizumab	garde 3	2310	0.499	1184	41		high-dose MP	recovered
9	Gastric cancer	Lightheadedness	68	female	no smoker	Hypertension		Second line	Camrelizumab	garde 4	5720	0.856	499	39		High-dose MP+IVIG+Plasmapheresis+MMF	recovered
10	lung cancer	Dyspnea	69	male	smoker	coronary heart disease	Pneumonitis	Third line and beyond	Envafolimab	garde 4	4300	0.621	250	29		High-dose MP+IVIG+Plasmapheresis+MMF	recovered
11	Thymic Carcinoma	Chest pain	47	male	no smoker		Hepatitis	Second line	Atezolizumab	garde 4	5200	0.648	395	46		High-dose MP+IVIG+Plasmapheresis+MMF	recovered
12	lung cancer	Palpitations	76	male	smoker	Hypertension	Pancreatitis	First line	Sintilimab	garde 4	15600	1.24	3251	96		High-dose MP+IVIG+Plasmapheresis+MMF	recovered
13	lung cancer	Dyspnea	47	male	smoker		Thyroiditis	First line	Durvalumab	garde 4	4413	0.523	2784	76		high-dose MP	recovered
14	Esophageal cancer	Dyspnea	35	female	no smoker	diabetes mellitus		First line	Pembrolizumab	garde 3	2210	0.452	300	41		high-dose MP	recovered
15	Gastric cancer	Chest pain	39	male	no smoker			Third line and beyond	Toripalimab	grade 3	3500	0.521	2350	62		High-dose MP+IVIG	recovered
16	Gastric cancer	Chest pain	69	female	no smoker	Hypertension		Second line	Tislelizumab	garde 4	8600	0.824	1607	45		High-dose MP+IVIG	deceased
17	lung cancer	Lightheadedness	52	male	smoker		Myositis	Third line and beyond	Sintilimab	garde 4	9200	0.864	4620	136		high-dose MP	deceased
18	lung cancer	Chest pain	68	male	smoker	diabetes mellitus	Thyroiditis	Second line	Toripalimab	garde 4	8600	0.623	1020	42		high-dose MP	deceased
19	lung cancer	Palpitations	71	male	smoker	Hypertension		First line	Camrelizumab	grade 3	1530	0.482	321	25		high-dose MP	deceased
20	Thymic Carcinoma	Palpitations	42	male	no smoker		Thyroiditis, Hepatitis	First line	Atezolizumab	garde 4	10681	0.786	2410	76		High-dose MP	deceased
21	lung cancer	Chest pain	80	male	smoker	Hypertension,coronary heart disease	hypophysitis	Second line	Sintilimab	garde 4	11220	0.526	2321	82		high-dose MP	deceased
22	Gastric cancer	Dyspnea	74	male	no smoker	Hyperthyroidism	Myositis, Myasthenia gravis	First line	Sintilimab	garde 4	30000	2.106	12600	262		high-dose MP+MMF	deceased
23	lung cancer	Dyspnea	36	male	smoker	diabetes mellitus	Pneumonitis	First line	Envafolimab	garde 4	3300	0.628	360	43		High-dose MP+IVIG	deceased
24	lung cancer	Chest pain	75	male	smoker	Hypertension	Pneumonitis	First line	Durvalumab	garde 4	8900	1.025	1250	65		High-dose MP+IVIG+Plasmapheresis+MMF	deceased
25	Thymic Carcinoma	Dyspnea	76	male	no smoker		Myositis, Myasthenia gravis	First line	Sintilimab	garde 4	13804	0.642	546	52		High-dose MP+IVIG+Plasmapheresis+MMF	deceased
26	Thymic Carcinoma	Palpitations	69	male	no smoker	Hypertension	Myositis, Myasthenia gravis	Third line and beyond	Pembrolizumab	garde 4	25100	1.268	8300	172		High-dose MP+IVIG+Plasmapheresis+MMF	deceased
27	Esophageal cancer	Chest pain	75	female	no smoker	coronary heart disease		Third line and beyond	Camrelizumab	garde 4	3860	0.512	890	38		high-dose MP	deceased
28	Nasopharyngeal carcinoma	Lightheadedness	71	female	no smoker	diabetes mellitus	Thyroiditis, Nephritis	Second line	Toripalimab	garde 4	9800	0.962	3520	92		high-dose MP	deceased
29	Liver Cancer	Dyspnea	76	female	no smoker		Myositis,Hepatitis	First line	Nivolumab	garde 4	11071	0.625	2540	72		High-dose MP+Tocilizumab	deceased
30	Bladder Cancer	Abdominal pain	49	male	no smoker		Myositis, Pancreatitis	First line	Sintilimab	garde 4	24844	1.268	4210	90		High-dose MP+Tocilizumab	deceased
31	lung cancer	Chest pain	66	male	smoker			Third line and beyond	Durvalumab	garde 3	1268	0.178	2784	52		high-dose MP	deceased	The cause of death was not attributed to myocarditis
32	Bladder Cancer	Dyspnea	52	male	no smoker	diabetes mellitus		Second line	Camrelizumab	garde 3	2140	0.421	1120	42		high-dose MP	deceased	The cause of death was not attributed to myocarditis
33	Breast cancer	Chest pain	52	female	no smoker			Second line	Penpulimab	garde 3	1680	0.369	980	50		high-dose MP	deceased	The cause of death was not attributed to myocarditis
34	Gastric cancer	Asymptomatic	68	male	no smoker			First line	Tislelizumab	grade 1	260	0.043	1110	32		oral prednisone	recovered
35	Esophageal cancer	Dyspnea	66	female	no smoker	Hypertension		Second line	Camrelizumab	grade 2	280	0.031	1240	58		MP	recovered
36	Cervical cancer	Dyspnea	38	female	no smoker			First line	Pembrolizumab	grade 2	1310	0.036	354	35		MP	recovered
37	Esophageal cancer	Muscle weakness	62	female	no smoker		Myositis, Hepatitis	First line	Camrelizumab	grade 2	4200	0.889	3240	82		MP	recovered
38	lung caner	Palpitations	49	male	smoker	Hypothyroidism	Dermatitis	First line	Nivolumab	grade 2	1300	0.295	2410	64		MP	recovered
39	Renal cell carcinoma	Dyspnea	51	female	no smoker	coronary heart disease		First line	Camrelizumab	grade 2	860	0.006	218	26		MP	recovered
40	Thymic Carcinoma	Palpitations	47	female	no smoker		Pneumonitis	Second line	Tislelizumab	grade 2	2324	0.525	2430	72		MP	recovered
41	lung cancer	Dyspnea	68	male	smoker	Hypertension		First line	Sintilimab	grade 2	1200	0.223	135	24		MP	recovered
42	Esophageal cancer	Muscle weakness	51	female	no smoker		Thyroiditis,Myositis	First line	Durvalumab	grade 2	1156	0.128	240	26		MP	recovered
43	Bladder Cancer	Palpitations	75	male	smoker	diabetes mellitus		First line	Camrelizumab	grade 2	1310	0.104	1354	64		MP	recovered
44	lung cancer	Palpitations	71	male	smoker		Hepatitis	First line	lvonescimab	grade 2	1310	0.115	820	32		MP	recovered
45	Esophageal cancer	Asymptomatic	46	female	no smoker		Thyroiditis	Third line and beyond	Tislelizumab	grade 1	486	0.034	688	46		oral prednisone	recovered
46	lung cancer	Asymptomatic	73	male	smoker	Hypertension		Second line	Sintilimab	grade 1	564	0.068	230	32		oral prednisone	recovered
47	Ampullary carcinoma	Palpitations	38	female	no smoker			First line	Camrelizumab	grade 2	1480	0.233	383	26		MP	recovered
48	Gastric cancer	Asymptomatic	34	female	no smoker		Myositis	Second line	Pembrolizumab	grade 1	500	0.154	1023	52		oral prednisone	recovered
49	Gallbladder cancer	Dyspnea	46	female	no smoker	coronary heart disease		Third line and beyond	Camrelizumab	grade 2	2308	0.148	270	32		MP	recovered
50	lung cancer	Muscle weakness	69	male	smoker		Thyroiditis	First line	Toripalimab	grade 2	2405	0.841	160	26		MP	recovered
51	lung cancer	Dyspnea	66	male	smoker	Hypertension		First line	Tislelizumab	grade 2	2300	0.496	281	37		MP	recovered
52	Gallbladder cancer	Muscle weakness	49	female	no smoker	Chronic kidney disease	Myositis	First line	Serplulimab	grade 2	4102	0.824	2630	84		MP	recovered
53	lung cancer	Dyspnea	78	male	smoker			Second line	Sintilimab	grade 2	2100	0.681	171	36		MP	recovered
54	Gastric cancer	Palpitations	74	male	no smoker			First line	Pembrolizumab	grade 2	1240	0.069	240	24		MP	recovered
55	lung cancer	Dyspnea	69	male	smoker		Myositis	First line	Camrelizumab	grade 2	646	0.047	2348	84		MP	recovered
56	lung cancer	Muscle weakness	66	male	smoker	Hypertension		Second line	Serplulimab	grade 2	580	0.027	1181	60		MP	recovered
57	Gastric cancer	Dyspnea	73	female	no smoker		Thyroiditis	First line	Sintilimab	grade 2	620	0.036	1378	68		MP	recovered
58	Cholangiocarcinoma	Palpitations	72	male	no smoker		Myositis	Second line	Tislelizumab	grade 2	860	0.039	260	70		MP	recovered
59	Liver Cancer	Palpitations	52	male	no smoker			First line	Toripalimab	grade 2	1020	0.15	458	48		MP	recovered
60	lung cacner	Dyspnea	69	male	smoker	diabetes mellitus		First line	Sintilimab	grade 2	1368	0.108	324	33		MP	recovered
61	Liver Cancer	Asymptomatic	60	male	no smoker			First line	Nivolumab	grade 1	398	0.021	1181	56		oral prednisone	recovered
62	lung cancer	Asymptomatic	75	male	smoker			First line	Pembrolizumab	grade 1	468	0.09	320	26		oral prednisone	recovered
63	Liver Cancer	Asymptomatic	61	male	no smoker	Hypertension		First line	Serplulimab	grade 1	420	0.042	377	34		oral prednisone	recovered
64	lung cancer	Asymptomatic	76	male	smoker			First line	Camrelizumab	grade 1	642	0.055	1081	51		oral prednisone	recovered
65	Cholangiocarcinoma	Palpitations	58	male	no smoker			First line	Pembrolizumab	grade 2	960	0.074	614	35		MP	recovered
66	lung cancer	Dyspnea	71	male	smoker			Second line	Sintilimab	grade 2	1126	0.129	1100	38		MP	recovered
67	lung cancer	Dyspnea	72	male	smoker			Third line and beyond	Tislelizumab	grade 2	2140	0.464	1376	41		MP	recovered
68	Colorectal cancer	Dyspnea	69	male	no smoker	diabetes mellitus	Myositis	First line	Toripalimab	grade 2	1286	0.223	1151	27		MP	recovered
69	Melanoma	Dyspnea	50	male	no smoker		Thyroiditis	First line	Camrelizumab	grade 2	1468	0.322	2338	80		MP	recovered
70	lung cancer	Dyspnea	75	male	smoker			First line	Candonilimab	grade 2	1524	0.317	820	54		MP	recovered
71	Cholangiocarcinoma	Asymptomatic	55	male	no smoker			Third line and beyond	Socazolimab	grade 1	624	0.064	298	26		oral prednisone	recovered
			MP: Methylprednisolone
			IVIG: Intravenous Immunoglobulin
			MMF: Mycophenolate Mofetil
